# Supplementary material for: Large-scale mRNA sequencing determines global regulation of RNA editing during brain development
Source: HighWire-hosted journal article supplement (doi:10.1101/gr.089409.108), 2009-05-06

**Figure S1.** Validation of *Gabra3* (A) and *Htr2c* (B) editing using conventional Sanger sequencing (eurofins MWG operon). RNA from whole mouse brain (3 individuals) at 4 developmental stages (E15, E19, P2 and P21) was amplified by RT-PCR and sequenced. The edited positions are indicated by arrows. The first individual in each developmental stage was used for 454 sequencing.

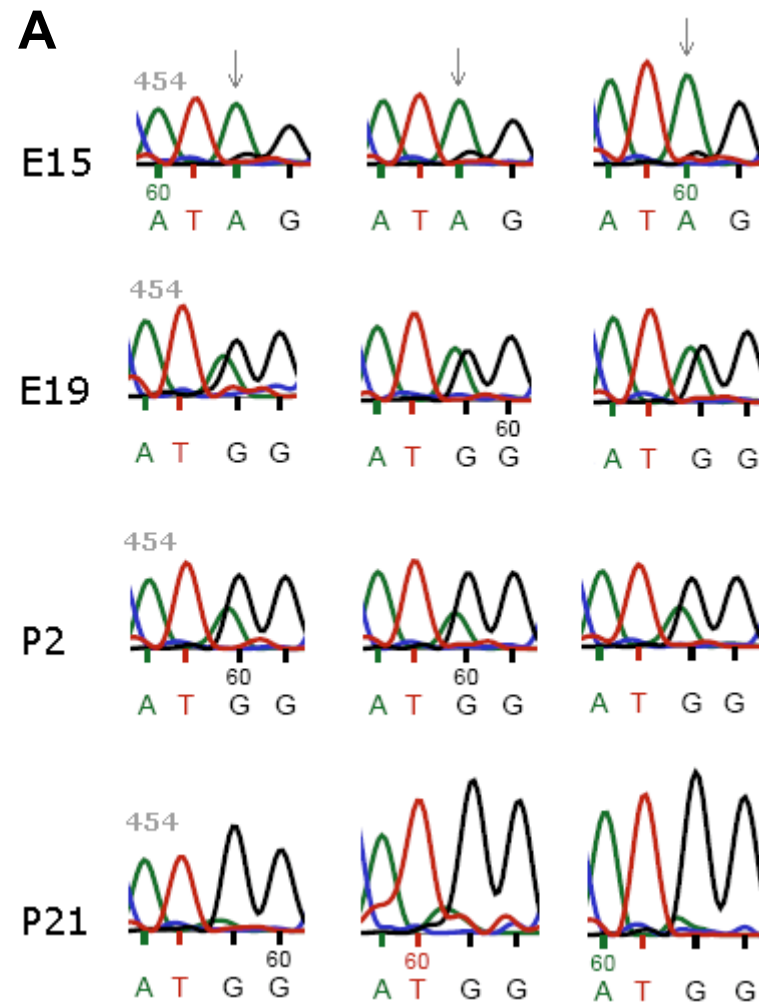

**B**

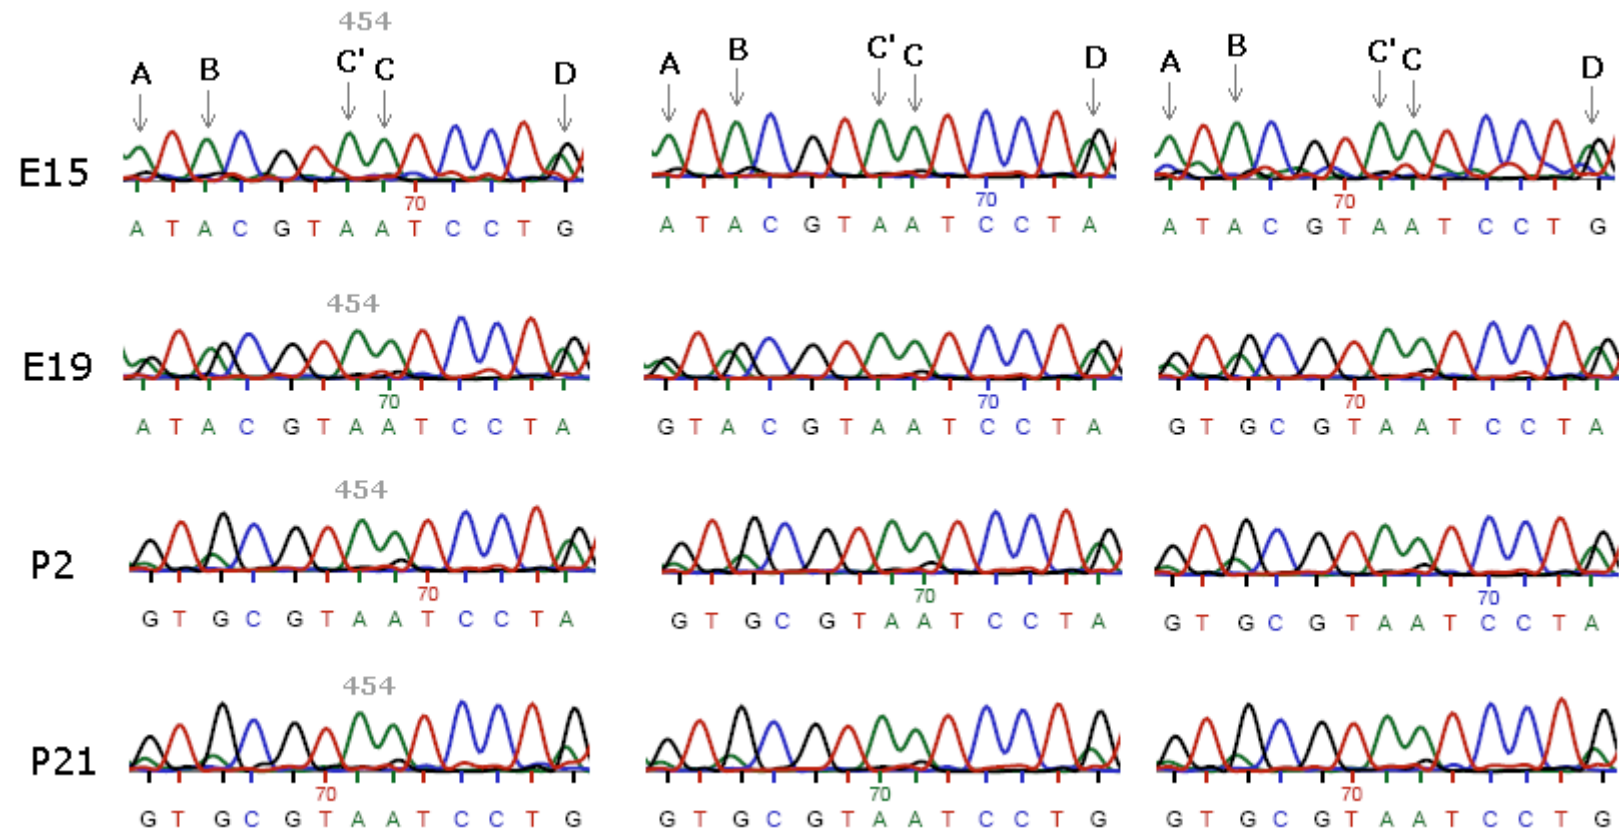

Supplement: figS1.pdf [file figS1.pdf]
